# Supplementary material
Source: PubMed Central journal article supplement (PMC5438909)
Supplement: NIHMS827299-supplement-1.pdf [file NIHMS827299-supplement-1.pdf]

**Figure S1: Cohort flow chart for the eligibility**

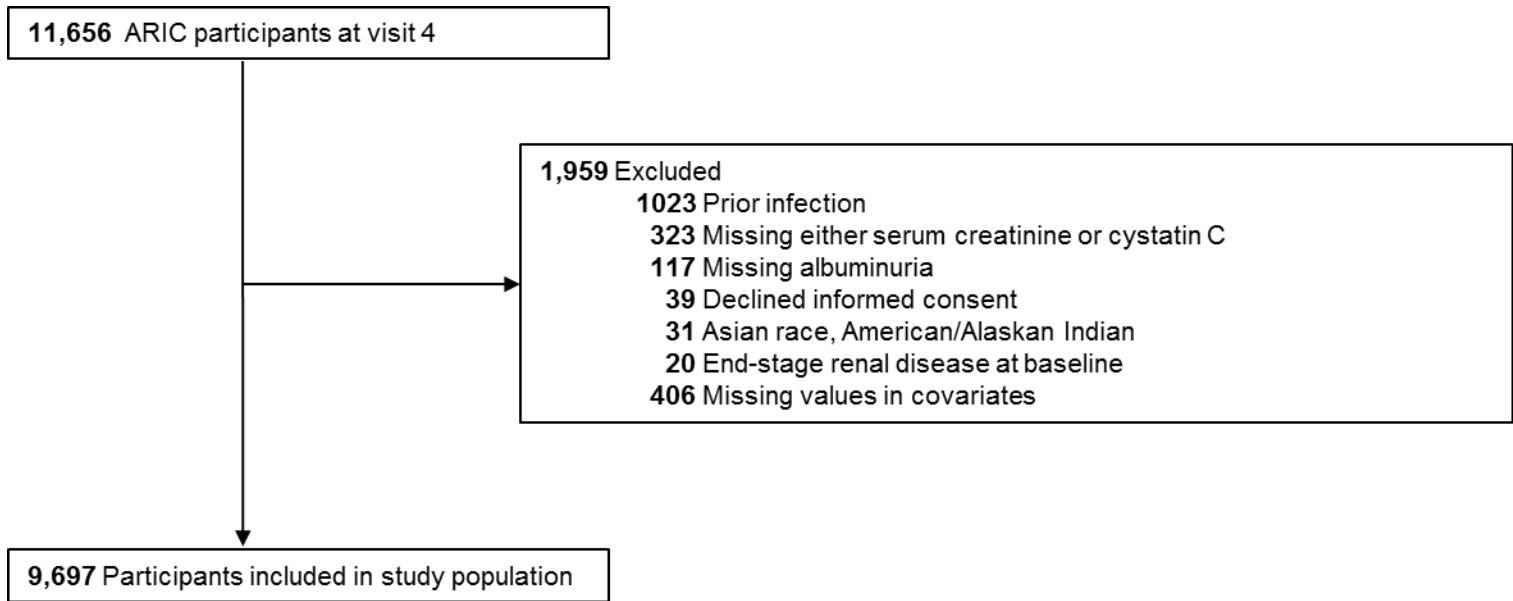

\*ARIC indicates Atherosclerosis Risk in Communities Study
