# Supplementary material
Source: PubMed Central journal article supplement (PMC5438909)
Supplement: NIHMS827299-supplement-2.pdf [file NIHMS827299-supplement-2.pdf]

**Figure S2: Subgroup analyses of the association of (A) eGFR and (B) ACR with relative hazard for infection-related hospitalization**

**A**

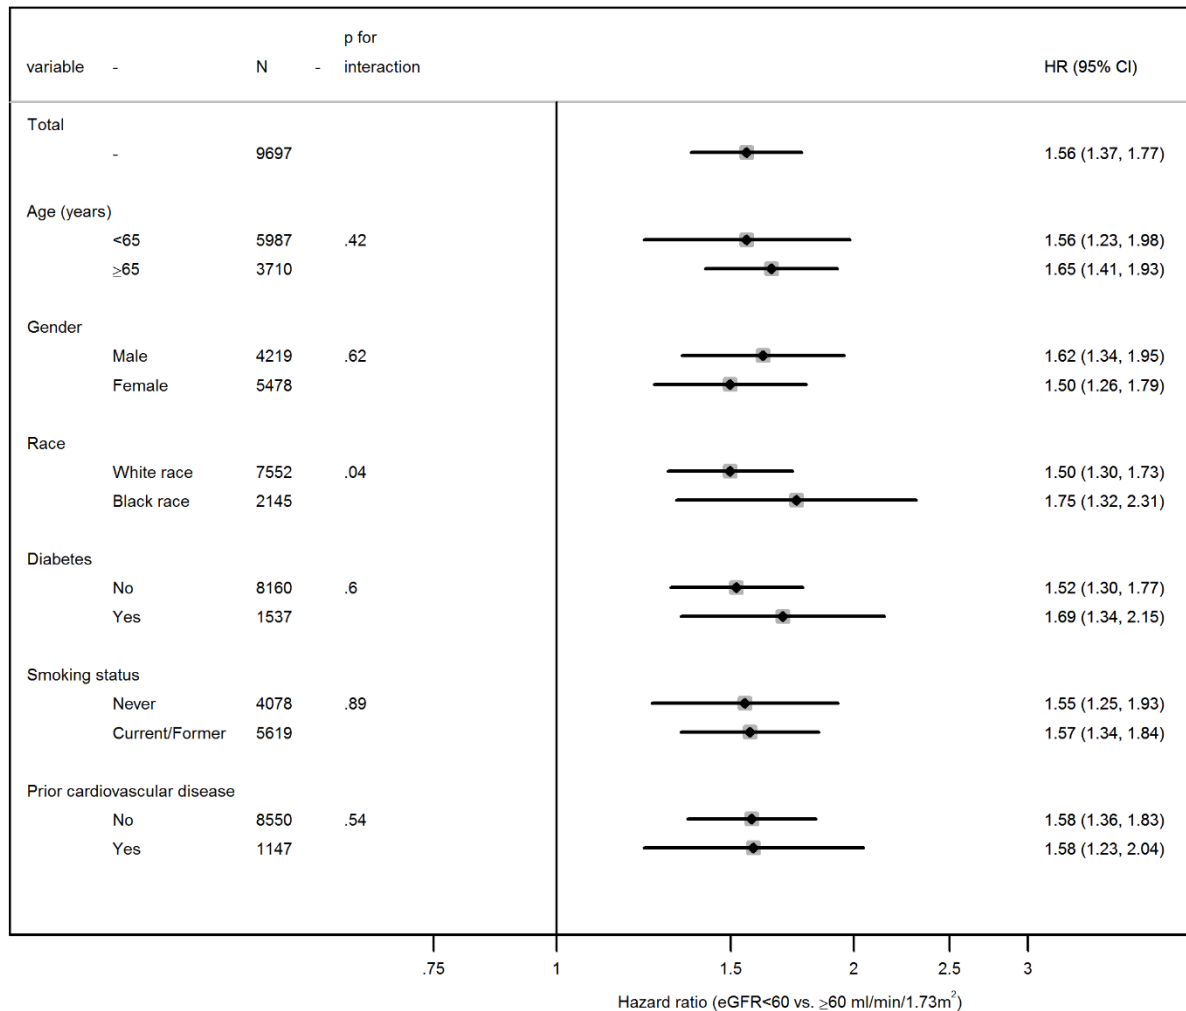

**B**

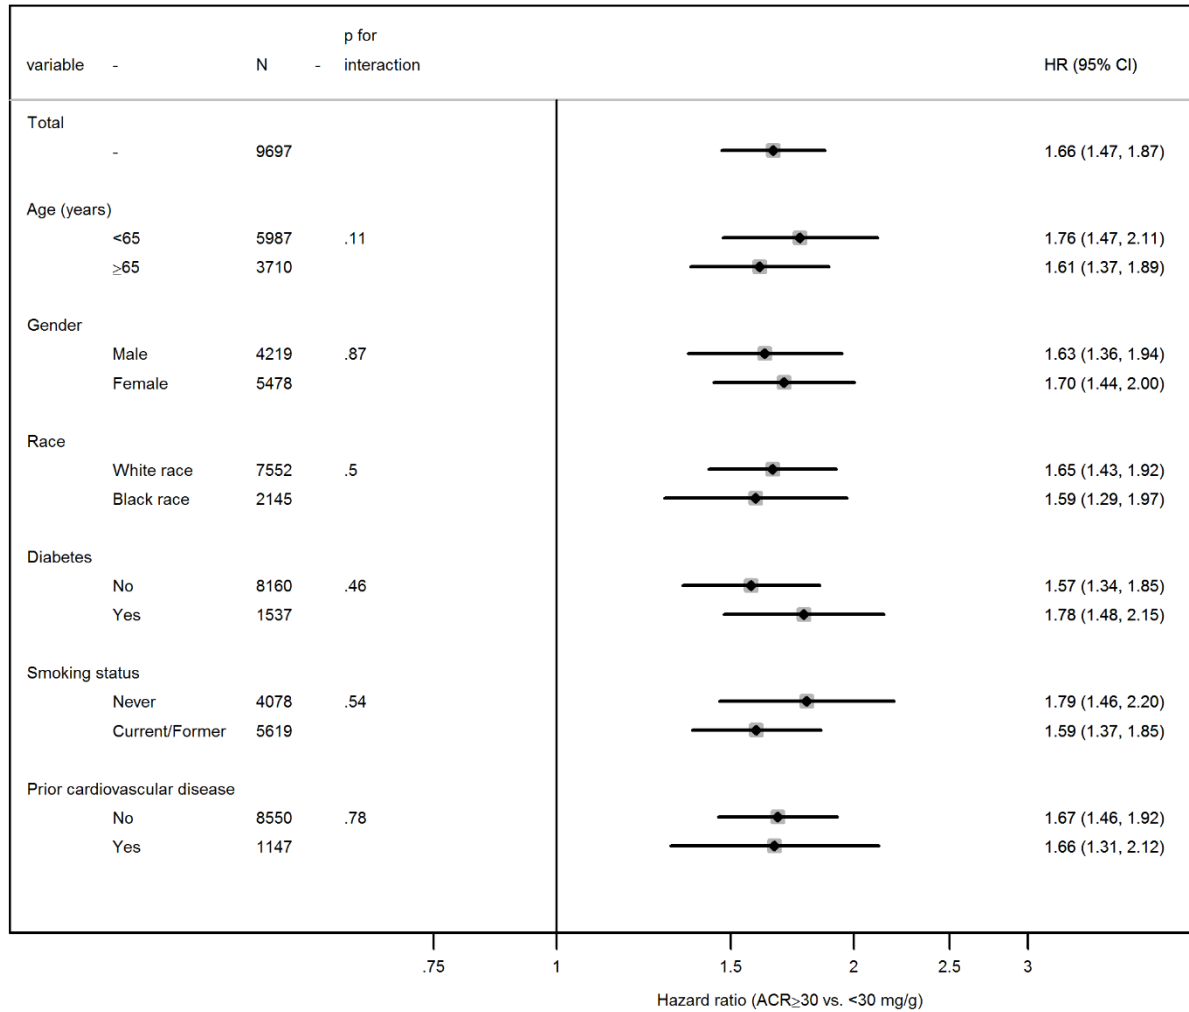

\*Abbreviations: eGFR, estimated glomerular filtration rate; ACR, albumin-to-creatinine ratio; HR, hazard ratio; CI, confidence interval. The model was adjusted for age, race, sex, body mass index, smoking status, alcohol consumption, education level, use of antineoplastic agents and steroids, hypertension, diabetes, history of cancer, chronic obstructive pulmonary disease, and prior cardiovascular disease. The squares represent the point estimate of relative hazard, and the horizontal lines indicates corresponding 95% confidence intervals.
