# Supplementary material
Source: PubMed Central journal article supplement (PMC5438909)
Supplement: NIHMS827299-supplement-3.pdf [file NIHMS827299-supplement-3.pdf]

**ITEM S1. Relative hazards for infection-related hospitalization**

**Table  $\alpha$ : Relative hazards for infection-related hospitalization censoring individuals at incident ESRD.**

|                                                   | Person-year | No. of events | Crude incident rate per 1,000 person-years (95%CI) | Adjusted hazard ratio (95%CI)** |
|---------------------------------------------------|-------------|---------------|----------------------------------------------------|---------------------------------|
| eGFR $\geq$ 90 ml/min/1.73m <sup>2</sup> (n=4164) | 51186       | 981           | 19.17 (18.00-20.40)                                | 1[Reference]                    |
| eGFR 60-89 ml/min/1.73m <sup>2</sup> (n=4922)     | 57182       | 1417          | 24.78 (23.52-26.10)                                | 1.06 (0.97-1.16)                |
| eGFR 30-59 ml/min/1.73m <sup>2</sup> (n=592)      | 5613        | 252           | 44.89 (39.68-50.79)                                | 1.41 (1.21-1.64)                |
| eGFR 15-29 ml/min/1.73m <sup>2</sup> (n=19)       | 105         | 5             | 47.84 (19.91-114.95)                               | 1.44 (0.59-3.49)                |
| ACR <10 mg/g (n=7821)                             | 94736       | 1964          | 20.73 (19.83-21.67)                                | 1[Reference]                    |
| ACR 10-29 mg/g (n=1131)                           | 12462       | 378           | 30.33 (27.42-33.55)                                | 1.34 (1.20-1.50)                |
| ACR 30-299 mg/g (n=609)                           | 5968        | 251           | 42.06 (37.17-47.60)                                | 1.54 (1.35-1.77)                |
| ACR $\geq$ 300 mg/g (n=136)                       | 920         | 62            | 67.37 (52.52-86.41)                                | 2.00 (1.53-2.60)                |

\*Abbreviations: ESRD, end-stage renal disease; eGFR, estimated glomerular filtration rate; ACR, albumin-to-creatinine ratio; CI, confidence interval.

\*\*During follow-up, 200 individuals (2.1%) developed incident ESRD at a median of 14.1 years after visit 4.

\*\*\*The model was adjusted for age, race, sex, body mass index, smoking status, alcohol consumption, education level, use of antineoplastic agents and steroids, hypertension, diabetes, history of cancer, chronic obstructive pulmonary disease, prior heart failure, prior coronary disease, prior stroke, and the ACR categories for the analysis of eGFR and the eGFR categories for the analysis of ACR.

**Table b: Relative hazards for infection-related hospitalization as the primary diagnosis**

|                                               | Person-year | No. of events | Crude incident rate per 1,000 person-years (95%CI) | Adjusted hazard ratio (95%CI)** |
|-----------------------------------------------|-------------|---------------|----------------------------------------------------|---------------------------------|
| eGFR ≥90 ml/min/1.73m <sup>2</sup> (n=4164)   | 39336       | 501           | 12.74 (11.67-13.90)                                | 1[Reference]                    |
| eGFR 60-89 ml/min/1.73m <sup>2</sup> (n=4922) | 47828       | 744           | 15.56 (14.48-16.71)                                | 1.05 (0.93-1.18)                |
| eGFR 30-59 ml/min/1.73m <sup>2</sup> (n=592)  | 5405        | 141           | 26.08 (22.12-30.77)                                | 1.40 (1.14-1.71)                |
| eGFR 15-29 ml/min/1.73m <sup>2</sup> (n=19)   | 152         | 8             | 52.64 (26.33-105.26)                               | 2.50 (1.21-5.14)                |
| ACR <10 mg/g (n=7821)                         | 75261       | 1008          | 13.39 (12.59-14.25)                                | 1[Reference]                    |
| ACR 10-29 mg/g (n=1131)                       | 10667       | 202           | 18.94 (16.50-21.74)                                | 1.32 (1.14-1.54)                |
| ACR 30-299 mg/g (n=609)                       | 5723        | 138           | 24.11 (20.41-28.49)                                | 1.50 (1.25-1.80)                |
| ACR ≥300 mg/g (n=136)                         | 1070        | 46            | 42.99 (32.20-57.39)                                | 2.21 (1.61-3.04)                |

<sup>a</sup> Abbreviations: eGFR, estimated glomerular filtration rate; ACR, albumin-to-creatinine ratio; CI, confidence interval.

\*The analysis was based on 1,394 cases of infection-related hospitalization as the primary diagnosis.

\*\*The model was adjusted for age, race, sex, body mass index, smoking status, alcohol consumption, education level, use of antineoplastic agents and steroids, hypertension, diabetes, history of cancer, chronic obstructive pulmonary disease, prior heart failure, prior coronary disease, prior stroke, and the ACR categories for the analysis of eGFR and the eGFR categories for the analysis of ACR.

**Table c: Relative hazards for infection-related hospitalization excluding 17 individuals with ACR  $\geq$ 2,000 mg/g**

|                                                   | Person-year | No. of events | Crude incident rate per 1,000 person-years (95%CI) | Adjusted hazard ratio (95%CI)** |
|---------------------------------------------------|-------------|---------------|----------------------------------------------------|---------------------------------|
| eGFR $\geq$ 90 ml/min/1.73m <sup>2</sup> (n=4163) | 51204       | 987           | 19.28 (18.11-20.52)                                | 1[Reference]                    |
| eGFR 60-89 ml/min/1.73m <sup>2</sup> (n=4918)     | 57184       | 1427          | 24.95 (23.69-26.28)                                | 1.07 (0.98-1.16)                |
| eGFR 30-59 ml/min/1.73m <sup>2</sup> (n=584)      | 5619        | 269           | 47.87 (42.48-53.95)                                | 1.48 (1.28-1.71)                |
| eGFR 0-29 ml/min/1.73m <sup>2</sup> (n=15)        | 119         | 8             | 67.16 (33.59-134.29)                               | 1.91 (0.94-3.85)                |
| ACR <10 mg/g (n=7821)                             | 94764       | 1977          | 20.86 (19.96-21.80)                                | 1[Reference]                    |
| ACR 10-29 mg/g (n=1131)                           | 12483       | 383           | 30.68 (27.76-33.91)                                | 1.34 (1.20-1.50)                |
| ACR 30-299 mg/g (n=609)                           | 6008        | 260           | 43.27 (38.32-48.87)                                | 1.56 (1.37-1.79)                |
| ACR $\geq$ 300 mg/g (n=119)                       | 869         | 71            | 81.68 (64.73-103.07)                               | 2.33 (1.82-2.98)                |

<sup>a</sup> Abbreviations: eGFR, estimated glomerular filtration rate; ACR, albumin-to-creatinine ratio; CI, confidence interval.

\*\*The model was adjusted for age, race, sex, body mass index, smoking status, alcohol consumption, education level, use of antineoplastic agents and steroids, hypertension, diabetes, history of cancer, chronic obstructive pulmonary disease, prior heart failure, prior coronary disease, prior stroke, and the ACR categories for the analysis of eGFR and the eGFR categories for the analysis of ACR.

**Table d: Relative hazards for infection-related hospitalization with the use of eGFR<sub>(CKD-EPI-Scr)</sub>**

|                                               | Person-year | No. of events | Crude incident rate per 1,000 person-years (95%CI) | Adjusted hazard ratio (95%CI)** |
|-----------------------------------------------|-------------|---------------|----------------------------------------------------|---------------------------------|
| eGFR ≥90 ml/min/1.73m <sup>2</sup> (n=4609)   | 55583       | 1160          | 20.87 (19.70-22.11)                                | 1[Reference]                    |
| eGFR 60-89 ml/min/1.73m <sup>2</sup> (n=4529) | 53107       | 1288          | 24.25 (22.96-25.61)                                | 0.98 (0.90-1.07)                |
| eGFR 30-59 ml/min/1.73m <sup>2</sup> (n=542)  | 5435        | 243           | 44.71 (39.43-50.70)                                | 1.35 (1.17-1.57)                |
| eGFR 15-29 ml/min/1.73m <sup>2</sup> (n=17)   | 112         | 10            | 89.06 (47.92-165.52)                               | 2.30 (1.22-4.34)                |
| ACR <10 mg/g (n=7821)                         | 94764       | 1977          | 20.86 (19.96-21.80)                                | 1[Reference]                    |
| ACR 10-29 mg/g (n=1131)                       | 12483       | 383           | 30.68 (27.76-33.91)                                | 1.34 (1.20-1.50)                |
| ACR 30-299 mg/g (n=609)                       | 6008        | 260           | 43.27 (38.32-48.87)                                | 1.57 (1.37-1.79)                |
| ACR ≥300 mg/g (n=136)                         | 982         | 81            | 82.52 (66.37-102.59)                               | 2.40 (1.89-3.03)                |

<sup>a</sup> Abbreviations: eGFR, estimated glomerular filtration rate; ACR, albumin-to-creatinine ratio; CI, confidence interval.

\*\*The model was adjusted for age, race, sex, body mass index, smoking status, alcohol consumption, education level, use of antineoplastic agents and steroids, hypertension, diabetes, history of cancer, chronic obstructive pulmonary disease, prior heart failure, prior coronary disease, prior stroke, and the ACR categories for the analysis of eGFR and the eGFR categories for the analysis of ACR.
