# Supplementary material
Source: PubMed Central journal article supplement (PMC5438909)
Supplement: NIHMS827299-supplement-4.pdf [file NIHMS827299-supplement-4.pdf]

**Table S1: List of ICD-9 codes and corresponding diagnosis**

| ICD-9         | Referred disease description                                |
|---------------|-------------------------------------------------------------|
| 001-139       | Infectious and parasitic diseases                           |
| 254.1         | Abscess of thymus                                           |
| 320-326       | Diseases of the nervous system                              |
| 331.81        | Rye's syndrome                                              |
| 372-372.39    | Conjunctivitis                                              |
| 373.0-373.2   | Inflammation of eyelids (Blepharitis, Chalazion)            |
| 382-382.4     | Suppurative and unspecified otitis media                    |
| 383           | Mastoiditis                                                 |
| 386.33        | Suppurative labyrinthitis                                   |
| 386.35        | Viral labyrinthitis                                         |
| 388.6         | Otorrhea                                                    |
| 390-393       | Rheumatic Fever                                             |
| 421-421.1     | Acute and subacute endocarditis                             |
| 422           | Acute myocarditis                                           |
| 422.91-422.93 | Acute myocarditis, idiopathic                               |
| 460-466       | Acute respiratory infections                                |
| 472-474.0     | Chronic pharyngitis and nasopharyngitis                     |
| 475-476.1     | Peritonsillar abscess                                       |
| 478.21-478.24 | Other diseases of upper respiratory tract                   |
| 478.29        | Other diseases of upper respiratory tract                   |
| 480-486       | Pneumonia and influenza                                     |
| 490           | Bronchitis, not specified as acute or chronic               |
| 491.1         | Mucopurulent chronic bronchitis                             |
| 494           | Bronchiectasis                                              |
| 510           | Empyema                                                     |
| 511           | Pleurisy                                                    |
| 513           | Abscess of lung and mediastinum                             |
| 518.6         | Allergic bronchopulmonary aspergillosis                     |
| 519.01        | Infection of tracheostomy stoma                             |
| 522.5         | Periapical abscess without sinus                            |
| 522.7         | Periapical abscess with sinus                               |
| 527.3         | Abscess of salivary gland                                   |
| 528.3         | Cellulitis and abscess of oral soft tissues                 |
| 540-542       | Appendicitis                                                |
| 566-567.9     | Abscess of anal and rectal regions                          |
| 569.5         | Abscess of intestine                                        |
| 572-572.1     | Liver abscess and sequelae of chronic liver disease         |
| 573.1-573.3   | Hepatitis, toxic                                            |
| 575-575.12    | Other disorders of gallbladder                              |
| 590-590.9     | Infections of kidney                                        |
| 595-595.4     | Cystitis                                                    |
| 597-597.89    | Urethritis, not sexually transmitted, and urethral syndrome |
| 598           | Stricture, urethral, unspecified infection                  |
| 599           | Urinary tract infection, unspecified/pyuria                 |

|               |                                                                                         |
|---------------|-----------------------------------------------------------------------------------------|
| 601-601.9     | Inflammatory diseases of prostate                                                       |
| 604-604.9     | Orchitis and epididymitis                                                               |
| 607.1         | Balanitis                                                                               |
| 607.2         | Other inflammatory disorders of penis                                                   |
| 608           | Seminal vesiculitis                                                                     |
| 608.4         | Other inflammatory disorders of male genital organs                                     |
| 611           | Inflammatory disease of breast                                                          |
| 614-616.1     | Inflammatory disease of ovary fallopian tube pelvic cellular tissue and peritoneum      |
| 616.3-616.4   | Abscess of Bartholin's gland, Other abscess of vulva                                    |
| 616.8         | Other specified inflammatory diseases of cervix vagina and vulva                        |
| 670           | Major puerperal infection                                                               |
| 680-686.9     | Infections of skin and subcutaneous tissue                                              |
| 706           | Acne varioliformis                                                                      |
| 711-711.9     | Arthropathy associated with infections                                                  |
| 730-730.3     | Osteomyelitis, periostitis, and other infections involving bone                         |
| 730.8-730.9   | Osteomyelitis, periostitis, and other infections involving bone                         |
| 790.7         | Bacteremia (not septicemia)                                                             |
| 790.8         | Viremia, unspecified                                                                    |
| 996.60-996.69 | Infection and inflammatory reaction due to internal prosthetic device implant and graft |
| 997.62        | Infection of amputation stump, unspecified extremity                                    |
| 998.5         | Postoperative infection not elsewhere classified                                        |
| 999.3.        | Other infection due to medical care not elsewhere classified                            |

\*The definitions of infection-related ICD-9 codes were based on the analytical methods used in United States Renal Data System (USRDS). Details are available at the USRDS website ([http://www.usrds.org/2014/view/v2\\_00\\_appx.aspx](http://www.usrds.org/2014/view/v2_00_appx.aspx).)
