# Supplementary material
Source: PubMed Central journal article supplement (PMC5438909)
Supplement: NIHMS827299-supplement-5.pdf [file NIHMS827299-supplement-5.pdf]

**Tables S2: Baseline characteristics stratified according to ACR categories**

| Characteristics                               | ACR category (mg/g) |                   |                   |                 | P-for-trend |
|-----------------------------------------------|---------------------|-------------------|-------------------|-----------------|-------------|
|                                               | <10<br>(n=7821)     | 10-29<br>(n=1131) | 30-299<br>(n=609) | ≥300<br>(n=136) |             |
| Age mean(SD) y                                | 62 (6)              | 64 (6)            | 64 (6)            | 65 (6)          | <0.001      |
| Female No.(%)                                 | 4380 (56)           | 694 (61)          | 331 (54)          | 73 (54)         | 0.004       |
| Black race No.(%)                             | 1658 (21)           | 203 (18)          | 225 (37)          | 59 (43)         | <0.001      |
| Body mass index mean(SD),(kg/m <sup>2</sup> ) | 29 (5)              | 29 (6)            | 30 (6)            | 31 (7)          | <0.001      |
| Current/Former smoker No. (% in column)       |                     |                   |                   |                 |             |
| Current smoker                                | 1088 (14)           | 188 (17)          | 138 (23)          | 23 (17)         | <0.001      |
| Former smoker                                 | 3403 (44)           | 479 (42)          | 241 (40)          | 59 (43)         |             |
| Never smoker                                  | 3330 (43)           | 464 (41)          | 230 (38)          | 54 (40)         |             |
| Current/Former alcohol consumer No.(%)        | 6245 (80)           | 896 (79)          | 458 (75)          | 97 (71)         | 0.005       |
| 12 years or more of education No.(%)          | 6466 (83)           | 900 (80)          | 437 (72)          | 93 (68)         | <0.001      |
| eGFR No. (% in column)                        |                     |                   |                   |                 |             |
| 15-29 ml/min/1.73m <sup>2</sup>               | 6 (0)               | 1 (0)             | 3 (0)             | 9 (7)           | <0.001      |
| 30-44 ml/min/1.73m <sup>2</sup>               | 76 (1)              | 22 (2)            | 34 (6)            | 19 (14)         |             |
| 45-59 ml/min/1.73m <sup>2</sup>               | 289 (4)             | 64 (6)            | 64 (11)           | 24 (18)         |             |
| 60-74 ml/min/1.73m <sup>2</sup>               | 1216 (16)           | 174 (15)          | 121 (20)          | 24 (18)         |             |
| 75-89 ml/min/1.73m <sup>2</sup>               | 2804 (36)           | 382 (34)          | 174 (29)          | 27 (20)         |             |
| ≥90 ml/min/1.73m <sup>2</sup>                 | 3430 (44)           | 488 (43)          | 213 (35)          | 33 (24)         |             |
| Medication use No. (%)                        |                     |                   |                   |                 |             |
| Antineoplastic agents                         | 81 (1)              | 16 (1)            | 6 (1)             | 0 (0)           | 0.410       |
| Steroids or immunosuppressive agents          | 132 (2)             | 17 (2)            | 13 (2)            | 5 (4)           | 0.255       |
| Medical history No.(%)                        |                     |                   |                   |                 |             |
| Hypertension                                  | 2617 (33)           | 506 (45)          | 361 (59)          | 115 (85)        | <0.001      |
| Diabetes                                      | 984 (13)            | 243 (21)          | 226 (37)          | 84 (62)         | <0.001      |
| Cancer                                        | 364 (5)             | 64 (6)            | 33 (5)            | 5 (4)           | 0.381       |
| Chronic obstructive pulmonary disease         | 112 (1)             | 18 (2)            | 15 (2)            | 6 (4)           | 0.010       |
| Prior heart failure                           | 277 (4)             | 67 (6)            | 64 (11)           | 18 (13)         | <0.001      |
| Prior coronary heart disease                  | 491 (6)             | 94 (8)            | 81 (13)           | 33 (24)         | <0.001      |
| Prior stroke                                  | 119 (2)             | 31 (3)            | 27 (4)            | 9 (7)           | <0.001      |

<sup>a</sup> Abbreviations: eGFR, estimated glomerular filtration rate; ACR, albumin-to-creatinine ratio
