# Supplementary material
Source: PubMed Central journal article supplement (PMC5438909)
Supplement: NIHMS827299-supplement-6.pdf [file NIHMS827299-supplement-6.pdf]

**Table S3: Hazard ratio for hospitalization without infectious disease**

|                                               | Person-year | No. of events | Crude incident rate per 1,000 person-years (95%CI) | Adjusted hazard ratio (95%CI)** |
|-----------------------------------------------|-------------|---------------|----------------------------------------------------|---------------------------------|
| eGFR ≥90 ml/min/1.73m <sup>2</sup> (n=4164)   | 27593       | 1691          | 61.28 (58.43-64.28)                                | 1[Reference]                    |
| eGFR 60-89 ml/min/1.73m <sup>2</sup> (n=4922) | 27788       | 2051          | 73.81 (70.68-77.07)                                | 1.00 (0.93-1.07)                |
| eGFR 30-59 ml/min/1.73m <sup>2</sup> (n=592)  | 2123        | 227           | 106.94 (93.90-121.80)                              | 1.16 (1.00-1.34)                |
| eGFR 15-29 ml/min/1.73m <sup>2</sup> (n=19)   | 14          | 3             | 212.11 (68.41-657.66)                              | 1.69 (0.53-5.36)                |
| ACR <10 mg/g (n=7821)                         | 48715       | 3201          | 65.71 (63.47-68.03)                                | 1[Reference]                    |
| ACR 10-29 mg/g (n=1131)                       | 6061        | 463           | 76.39 (69.74-83.67)                                | 1.10 (0.99-1.21)                |
| ACR 30-299 mg/g (n=609)                       | 2395        | 254           | 106.06 (93.79-119.94)                              | 1.33 (1.17-1.52)                |
| ACR ≥300 mg/g (n=136)                         | 346         | 54            | 155.96 (119.44-203.63)                             | 1.71 (1.29-2.26)                |

\*Seemingly unrelated regression analysis comparing to hospitalization with infection: P-values were p=0.42 for eGFR category and p=0.013 for ACR category when treated as categorical variables, and <0.001 for both eGFR and log-ACR when treated as continuous variables
